# Supplementary material
Source: publisher figshare collection journal article supplement (https://acs.figshare.com/ndownloader/files/23540236)
Supplement: Supplementary file 1 [file 23540236]

## **Nanotechnology for COVID-19: Therapeutics and Vaccine Research**

Gaurav Chauhan<sup>1\*</sup>, Marc J Madou<sup>1,2\*</sup>, Sourav Kalra<sup>3</sup>, Vianni Chopra<sup>4</sup>, Deepa Ghosh<sup>4</sup>, and Sergio O. Martinez-Chapa<sup>1\*</sup>

<sup>1</sup> School of Engineering and Sciences, Tecnologico de Monterrey, Av. Eugenio Garza Sada 2501 Sur, 64849, Monterrey, NL, Mexico

<sup>2</sup> Department of Mechanical and Aerospace Engineering, University of California Irvine, Engineering Gateway 4200, Irvine, CA, 92697, USA

<sup>3</sup> Department of Pharmaceutical Technology (Process Chemistry), National Institute of Pharmaceutical Education and Research, Sector-67, S.A.S. Nagar, Punjab-160 062, India

<sup>4</sup> Institute of Nano Science and Technology, Habitat Centre, Phase 10, Mohali, Punjab 160062, India

### **Corresponding Authors**

\* Gaurav Chauhan (gchauhan@tec.mx)

\* Sergio O. Martinez Chapa (smart@tec.mx)

\* Marc J Madou (mmadou@uci.edu)

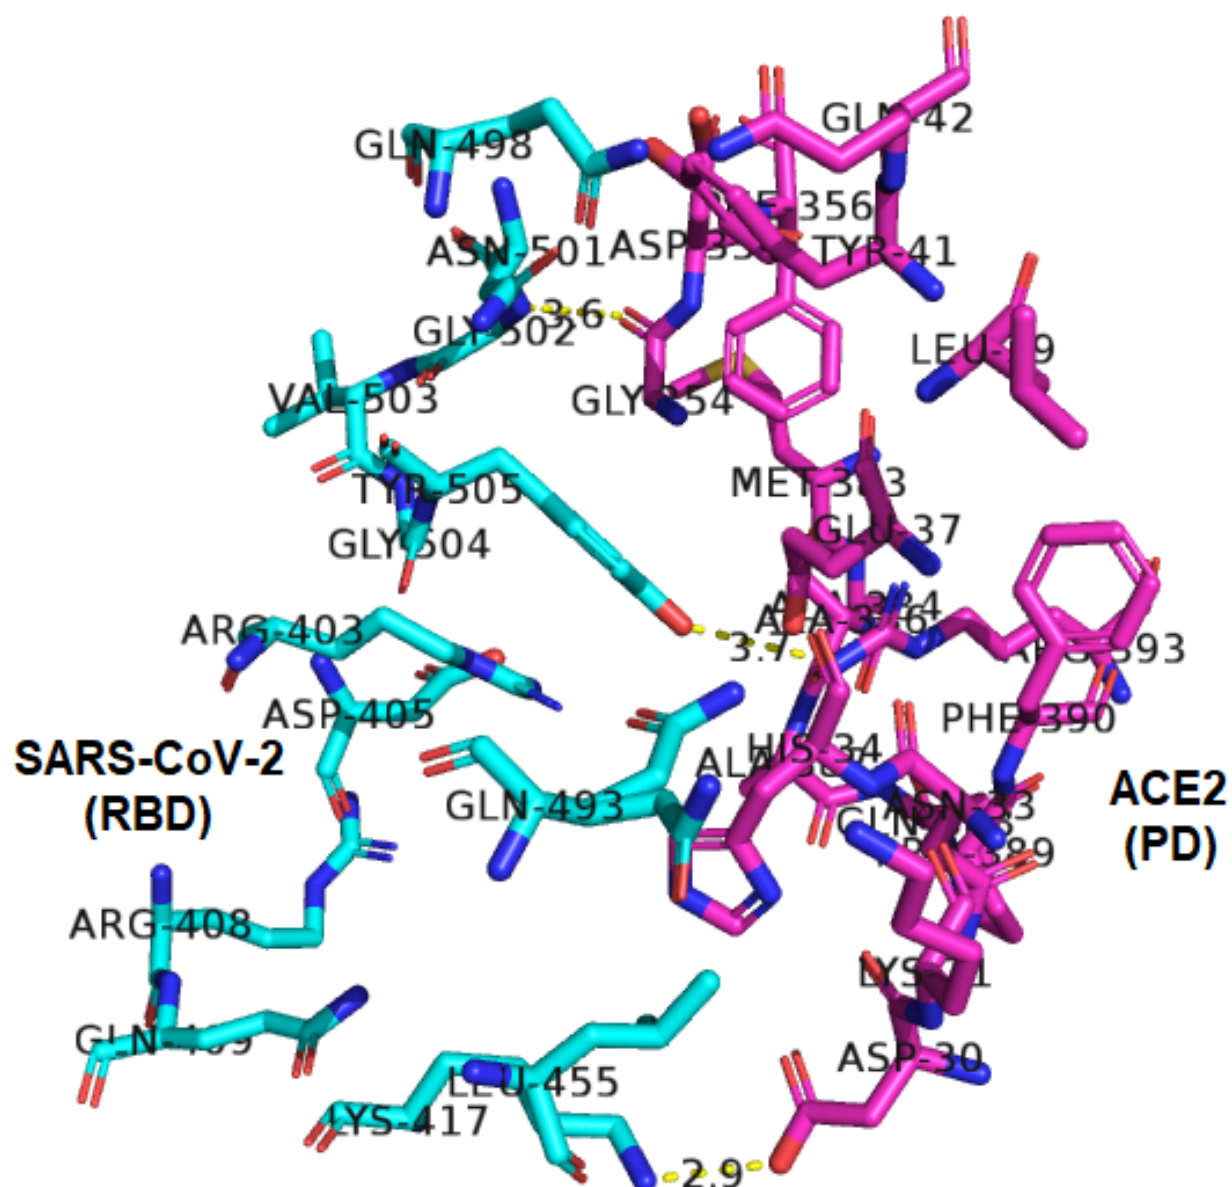

**S-Fig. 1** Representation of the residues that are involved in the interaction of RBD domain of the SARS-CoV-2 with peptidase domain of Human ACE 2 (PDB ID: 6M0J)

**Table-S1. Side effects/toxicity of existing antiviral molecules under development for COVID-19 therapeutics**

| <b>Candidate</b>                              | <b>Side effects/ toxicity</b>                                                                                                                                                                                                                                                                                                                                                                                                                                                         |
|-----------------------------------------------|---------------------------------------------------------------------------------------------------------------------------------------------------------------------------------------------------------------------------------------------------------------------------------------------------------------------------------------------------------------------------------------------------------------------------------------------------------------------------------------|
| <b>Chloroquine</b>                            | Visual acuity, insomnia, pruritus, the feeling of “stings” into the skin, and paresthesias.                                                                                                                                                                                                                                                                                                                                                                                           |
| <b>Hydroxychloroquine</b>                     | Blistering, peeling, loosening of the skin, blurred vision or other vision changes, chest discomfort, pain, or tightness, cough or hoarseness, dark urine, decreased urination, defective color vision, diarrhea, difficulty breathing, difficulty seeing at night, dizziness or fainting, fast, pounding, uneven heartbeat, fever with or without chills, general feeling of tiredness or weakness, headache, sore throat sores, ulcers, or white spots on the lips or in the mouth. |
| <b>Tenofovir</b>                              | Depression, pain, back pain, diarrhea, headache, trouble sleeping, nausea or vomiting, rash, lactic acidosis, liver enlargement, worsening hepatitis B virus infection, decreased bone mineral density, immune reconstitution syndrome, kidney damage and reduced kidney function.                                                                                                                                                                                                    |
| <b>Remdesivir</b>                             | Nausea, Vomiting.                                                                                                                                                                                                                                                                                                                                                                                                                                                                     |
| <b>Favipiravir</b>                            | Teratogenic and embryotoxic effects on animals.                                                                                                                                                                                                                                                                                                                                                                                                                                       |
| <b>Galidesivir</b>                            | NA                                                                                                                                                                                                                                                                                                                                                                                                                                                                                    |
| <b>EIDD-2801</b>                              | NA                                                                                                                                                                                                                                                                                                                                                                                                                                                                                    |
| <b>Ribavirin</b>                              | Causes ribavirin-induced anemia has been shown to involve reductions in reticulocyte counts and erythrocyte Na-K pump activity, and increases in K-Cl cotransport, membrane bound IgG, and C3, and erythrocyte band 3.                                                                                                                                                                                                                                                                |
| <b>Emtricitabine</b>                          | Headache, dizziness, weakness; indigestion, stomach pain, nausea, vomiting, diarrhea hepatotoxicity with steatosis, as well as lactic acidosis.                                                                                                                                                                                                                                                                                                                                       |
| <b>Darunavir</b>                              | Stuffy or runny nose, liver problems and severe skin reactions or rash, diarrhea, nausea, vomiting, heartburn, stomach pain, weakness, headache, or changes in the shape or location of body fat.                                                                                                                                                                                                                                                                                     |
| <b><math>\alpha</math>-Ketomide inhibitor</b> | NA                                                                                                                                                                                                                                                                                                                                                                                                                                                                                    |
| <b>Lopinavir</b>                              | Increased serum cholesterol and increased serum triglycerides, blurred vision, chills, constipation, darkened urine, dry mouth, fast heartbeat.                                                                                                                                                                                                                                                                                                                                       |
| <b>Ritonavir</b>                              | Hepatotoxicity, pancreatitis, and allergic reactions / hypersensitivity.                                                                                                                                                                                                                                                                                                                                                                                                              |
| <b>Camostat</b>                               | Dizziness, burning sensation, chest pain, skin rash, hair loss, nausea, vomiting, stomach pain, dry mouth.                                                                                                                                                                                                                                                                                                                                                                            |
| <b>Baricitinib</b>                            | Upper respiratory tract infections (common cold, sinus infections), and shingles.                                                                                                                                                                                                                                                                                                                                                                                                     |

|                    |                                                                                                                                                                                                                                                                                                                                                          |
|--------------------|----------------------------------------------------------------------------------------------------------------------------------------------------------------------------------------------------------------------------------------------------------------------------------------------------------------------------------------------------------|
| <b>Ruxolitinib</b> | Anemia, balance impairment, dizziness, headache, labyrinthitis, meniere's disease, neutropenia, thrombocytopenia, vertigo, and orthostatic dizziness. Other side effects include weight gain, and flatulence.                                                                                                                                            |
| <b>Umifenovir</b>  | Side effects in children include sensitization to the drug, allergic reactions are limited to people with hypersensitivity.                                                                                                                                                                                                                              |
| <b>Fingolimod</b>  | Liver problems, increased risk of infections, macular edema, trouble breathing, increased blood pressure, leukoencephalopathy, cancer (Basal cell carcinoma and melanoma), allergy.                                                                                                                                                                      |
| <b>Thalidomide</b> | Drowsiness, sleepiness, dizziness, constipation, muscle weakness, dry skin, anxiety, confusion, tremors or shaking, bone pain, sleep problems (insomnia), nausea, or loss of appetite, May cause possibly severe nerve damage, which may be permanent, can cause severe birth defects or embryofetal death, even with 1 dose, if taken during pregnancy. |

**Table-S2. Predicted properties of Existing antiviral molecules under development for COVID-19 therapeutics**

| <b>Drug candidate</b>        | <b>Pka (acid) (Predicted)</b> | <b>Pka (basic) (predicted)</b> | <b>Bioavailability</b> | <b>Biodegradation</b>       |
|------------------------------|-------------------------------|--------------------------------|------------------------|-----------------------------|
| $\alpha$ -Ketomide inhibitor | NA                            | NA                             | NA                     | NA                          |
| Ribavirin                    | 11.88                         | -1.2                           | 1                      | 0.7406                      |
| Favipiravir                  | 9.39                          | -3.7                           | 1                      | NA                          |
| Galidesivir                  | 12.95                         | 8.46                           | 1                      | NA                          |
| EIDD-2801                    | 8.21                          | -3.7                           | 1                      | NA                          |
| Thalidomide                  | 11.59                         | -6.4                           | 1                      | 0.8838                      |
| Emtricitabine                | 14.29                         | -3.61                          | 1                      | 1<br>(not ready degradable) |
| Tenofovir                    | 1.35                          | 3.74                           | 1                      | NA                          |
| Baricitinib                  | 13.89                         | 3.91                           | 1                      | NA                          |
| Remdesivir                   | 10.23                         | 0.65                           | 0                      | NA                          |
| Ruxolitinib                  | 13.89                         | 5.51                           | 1                      | 0.9917                      |
| Darunavir                    | 13.59                         | 2.39                           | 0                      | 1(not ready degradable)     |
| Camostat                     | 19.54                         | 8.54                           | 1                      | NA                          |

## Supplementary information

|                    |       |       |   |                              |
|--------------------|-------|-------|---|------------------------------|
| Hydroxychloroquine | 15.59 | 9.76  | 1 | 1(not ready degradable)      |
| Chloroquine        | NA    | 10.32 | 1 | 1(not ready degradable)      |
| Fingolimod         | 14.41 | 9.38  | 1 | 0.9662(not ready degradable) |
| Umifenovir         | 6.01  | 9.87  | 1 | NA                           |
| Lopinavir          | 13.39 | -1.5  | 0 | 0.9182 not ready degradable  |
| Ritonavir          | 13.68 | 2.84  | 0 | 0.9633 not ready degradable  |

pKa (acid), pKa (base) and bioavailibility is calculated by **ChemAxon**  
Biodegradation was calculated **admetSAR**

**ChemAxon for pKa (acid) and pKa (basic):** Highly-accurate calculation of pKa values along with pH-% of distribution plots of relevant microspecies in water - pKa documentation

### Chemaxon for Bioavailibility:

|                                                                                                                                                                                    |                                                                                                                                                                                                                                                                                                                                                                      |
|------------------------------------------------------------------------------------------------------------------------------------------------------------------------------------|----------------------------------------------------------------------------------------------------------------------------------------------------------------------------------------------------------------------------------------------------------------------------------------------------------------------------------------------------------------------|
| (mass() <= 500) + (logP() <= 5) +<br>(donorCount() <= 5) + (acceptorCount()<br><= 10) + (rotatableBondCount() <= 10) +<br>(PSA() <= 200) +<br>(fusedAromaticRingCount() <= 5) >= 6 | A bioavailability filter. 6 out of the 7 filters must pass for the whole rule to evaluate to TRUE. In the context of the + operator the value or the individual rules is 0 (fail) or 1 (pass), and so this expression is just adding up the 1's to find out how many individual terms have passed, and then checked whether this total is greater than or equal to 6 |
|------------------------------------------------------------------------------------------------------------------------------------------------------------------------------------|----------------------------------------------------------------------------------------------------------------------------------------------------------------------------------------------------------------------------------------------------------------------------------------------------------------------------------------------------------------------|

### admetSAR for Biodegradation:

A large diverse biodegradability database containing 1440 unique compounds was obtained 529 (ready biodegradable) and 911 (not ready biodegradable). QBSR (quantitative biodegradable structure relationship)
